# Supplementary material
Source: PubMed Central journal article supplement (PMC6865783)
Supplement: jamaneurol-77-215-s003.pdf [file jamaneurol-77-215-s003.pdf]

## Data Sharing Statement

Tsai. Reactions to Multiple Ascending Doses of the Microtubule Stabilizer TPI-287 in Patients With Alzheimer Disease, Progressive Supranuclear Palsy, and Corticobasal Syndrome. *JAMA Neurol.* Published November 11, 2019. 10.1001/jamaneurol.2019.3812

### Data

**Data available:** Yes

**Data types:** Deidentified participant data

**How to access data:** [adam.boxer@ucsf.edu](mailto:adam.boxer@ucsf.edu)

**When available:** With publication

### Supporting Documents

**Document types:** None

### Additional Information

**Who can access the data:** researchers whose proposed use of the data has been approved

**Types of analyses:** biomarker development, imaging analyses

**Mechanisms of data availability:** after approval of a proposal
